# Supplementary material
Source: Springer Nature journal article supplement (https://www.springermedizin.de/resource/supplementary/12906_2010_354_MOESM3_ESM.pdf/9519502)

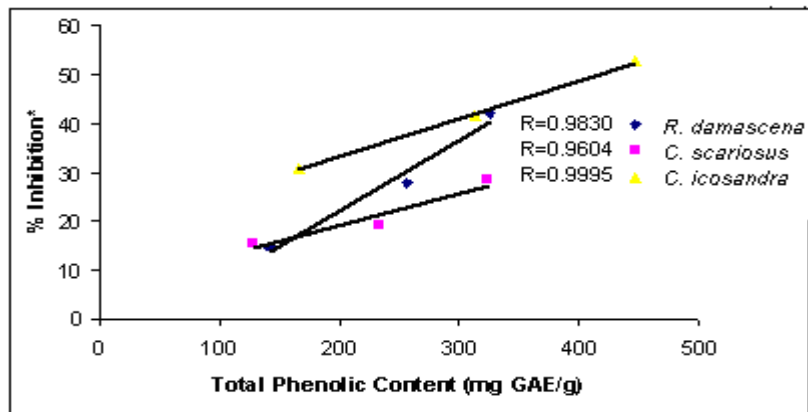

(a)

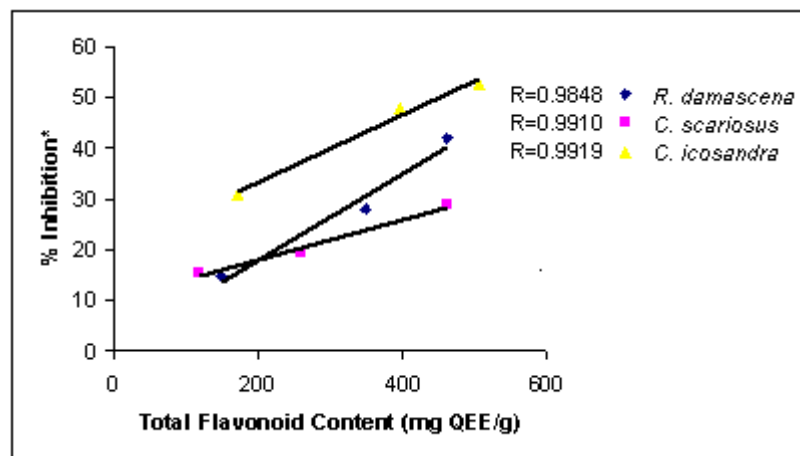

(b)

Supplement: MOESM3 [file 9519502]
